# Supplementary material
Source: PubMed Central journal article supplement (PMC5736307)
Supplement: NIHMS922449-supplement-Supplementary.pdf [file NIHMS922449-supplement-Supplementary.pdf]

## **SUPPLEMENTARY MATERIAL**

**Supplementary 1.** International Myositis Classification Criteria Project Steering Committee

**Supplementary 2.** Pilot study

**Supplementary 3.** International Myositis Classification Criteria Project questionnaire

**Supplementary 4.** Glossary and definitions for the International Myositis Classification

Criteria Project questionnaire

**Supplementary 5.** Adult comparator cases in the International Myositis Classification

Criteria Project dataset

**Supplementary 6.** Juvenile comparator cases in the International Myositis Classification

Criteria Project dataset

**Supplementary 7.** Validation cohort from the Euromyositis register

**Supplementary 8.** Validation cohort from the Juvenile dermatomyositis cohort biomarker study and repository (UK and Ireland)

**Supplementary 1.** International Myositis Classification Criteria Project Steering Committee

| Name                                 | Affiliation                                                                                                                                                                                               |
|--------------------------------------|-----------------------------------------------------------------------------------------------------------------------------------------------------------------------------------------------------------|
| Lars Alfredsson                      | Institute for Environmental Medicine, Karolinska Institutet, Stockholm, Sweden                                                                                                                            |
| Anthony A Amato                      | Department of Neurology, Brigham and Women's Hospital, Harvard Medical School, Boston, USA                                                                                                                |
| Richard J Barohn                     | Department of Neurology, University of Kansas Medical Center, Kansas City, USA                                                                                                                            |
| Matteo Bottai                        | Institute for Environmental Medicine, Karolinska Institutet, Stockholm, Sweden                                                                                                                            |
| Matthew H Liang                      | Division of Rheumatology, Immunology and Allergy, Brigham and Women's Hospital, Boston, USA                                                                                                               |
| Ingrid E Lundberg (Project Director) | Rheumatology Unit, Department of Medicine, Karolinska University Hospital, Solna, Karolinska Institutet, Stockholm, Sweden                                                                                |
| Frederick W Miller                   | Environmental Autoimmunity Group, Clinical Research Branch, National Institute of Environmental Health Sciences, National Institutes of Health, US Department of Health and Human Services, Bethesda, USA |
| Clarissa Pilkington                  | Department of Rheumatology, Great Ormond Street Hospital for Children NHS Trust, London, United Kingdom                                                                                                   |
| Lisa G Rider                         | Environmental Autoimmunity Group, Clinical Research Branch, National Institute of Environmental Health Sciences, National Institutes of Health, US Department of Health and Human Services, Bethesda, USA |
| Jasvinder A Singh                    | University of Alabama and Birmingham VA Medical Center, Birmingham, USA & Mayo Clinic College of Medicine, Rochester, Minnesota, USA                                                                      |
| Marianne de Visser                   | Department of Neurology, Academic Medical Centre, Amsterdam, Netherlands                                                                                                                                  |
| Victoria P Werth                     | Department of Dermatology, Philadelphia VAMC and Hospital of the University of Pennsylvania, Philadelphia, USA                                                                                            |
| Anna Tjärnlund (Project Coordinator) | Rheumatology Unit, Department of Medicine, Karolinska University Hospital, Solna, Karolinska Institutet, Stockholm, Sweden                                                                                |

## Supplementary 2. Pilot study

| Category                                     | Variable                                                             | IIM<br>% (n)<br>present | IIM<br>% (n)<br>missing | Not IIM<br>% (n)<br>present | Not IIM<br>% (n)<br>missing | Sensitivity<br>(%) | Specificity<br>(%) |
|----------------------------------------------|----------------------------------------------------------------------|-------------------------|-------------------------|-----------------------------|-----------------------------|--------------------|--------------------|
| Clinical<br>Muscle                           | Weakness, Proximal UE                                                | 97 (33)                 | 0                       | 71 (10)                     | 0                           | 97                 | 29                 |
|                                              | Wrist or FF weakness                                                 | 56 (19)                 | 6 (2)                   | 2 (15)                      | 1 (7)                       | 56                 | 79                 |
|                                              | Wrist/FF > shoulder abductors                                        | 18 (6)                  | 9 (3)                   | 7 (1)                       | 14 (2)                      | 18                 | 79                 |
|                                              | Weakness, Proximal LE                                                | 97 (33)                 | 0                       | 50 (7)                      | 0                           | 97                 | 50                 |
|                                              | Hip abductor weakness                                                | 88 (30)                 | 6 (2)                   | 43 (6)                      | 7 (1)                       | 88                 | 50                 |
|                                              | Weakness distal LE                                                   | 41 (14)                 | 0                       | 21 (3)                      | 14 (2)                      | 41                 | 64                 |
|                                              | Knee extensors weaker than hip                                       | 18 (6)                  | 6 (2)                   | 7 (1)                       | 14 (2)                      | 18                 | 79                 |
|                                              | Neck flexor weakness                                                 | 85 (29)                 | 0                       | 43 (6)                      | 0                           | 85                 | 57                 |
|                                              | Neck extensor weakness                                               | 21 (7)                  | 21 (7)                  | 7 (1)                       | 21 (3)                      | 21                 | 71                 |
|                                              | Symmetric weakness                                                   | 85 (29)                 | 0                       | 57 (8)                      | 7 (1)                       | 85                 | 36                 |
|                                              | Muscle pain at rest                                                  | 32 (11)                 | 18 (6)                  | 29 (4)                      | 0                           | 32                 | 71                 |
|                                              | Muscle tenderness                                                    | 35 (12)                 | 9 (3)                   | 7 (1)                       | 7 (1)                       | 35                 | 86                 |
|                                              | Muscle atrophy distal forearms                                       | 18 (6)                  | 3 (1)                   | 0                           | 0                           | 18                 | 100                |
|                                              | Thigh atrophy                                                        | 32 (11)                 | 3 (1)                   | 0                           | 0                           | 32                 | 100                |
| Clinical<br>Skin<br>Rashes                   | Heliotrope                                                           | 38 (13)                 | 0                       | 0                           | 0                           | 38                 | 100                |
|                                              | Gottron's papules                                                    | 44 (15)                 | 0                       | 14 (2<br>DM sine)           | 0                           | 44                 | 86                 |
|                                              | Erythema extensor surfaces                                           | 35 (12)                 | 0                       | 29 (4)                      | 0                           | 35                 | 71                 |
|                                              | V-sign                                                               | 21 (7)                  | 0                       | 7 (1)                       | 0                           | 21                 | 93                 |
|                                              | Shawl sign                                                           | 24 (8)                  | 0                       | 0                           | 0                           | 24                 | 100                |
|                                              | Calcification                                                        | 9 (3)                   | 3 (1)                   | 0                           | 0                           | 9                  | 100                |
|                                              | Periungual erythema, petechiae, telangiectasis, cuticular overgrowth | 41 (14)                 | 0                       | 7 (1)                       | 0                           | 41                 | 93                 |
|                                              | Raynaud's                                                            | 18 (6)                  | 3 (1)                   | 29 (4)                      | 0                           | 18                 | 71                 |
| Clinical<br>Other                            | Family history AD                                                    | 26 (9)                  | 9 (3)                   | 28 (4)                      | 0                           | 26                 | 71                 |
|                                              | Acute onset                                                          | 71 (24)                 | 3 (1)                   | 43 (6)                      | 0                           | 71                 | 57                 |
|                                              | Arthritis                                                            | 47 (16)                 | 0                       | 43 (6)                      | 0                           | 47                 | 57                 |
|                                              | Polyarthralgias                                                      | 44 (15)                 | 0                       | 50 (7)                      | 0                           | 44                 | 50                 |
|                                              | Sjogren's syndrome                                                   | 3 (1)                   | 0                       | 7 (1)                       | 0                           | 3                  | 93                 |
|                                              | Systemic sclerosis                                                   | 0                       | 0                       | 7 (1)                       | 0                           | 0                  | 93                 |
|                                              | MCTD                                                                 | 0                       | 0                       | 0                           | 0                           | 0                  | 0                  |
|                                              | Rheumatoid arthritis                                                 | 0                       | 3 (1)                   | 43 (6)                      | 0                           | 0                  | 57                 |
|                                              | SLE                                                                  | 3 (1)                   | 0                       | 29 (4)                      | 0                           | 3                  | 71                 |
|                                              | Autoimmune thyroid disease                                           | 12 (4)                  | 18 (6)                  | 7 (1)                       | 42 (6)                      | 12                 | 50                 |
|                                              | Objective improvement strength after corticosteroid therapy          | 79 (27)                 | 6 (2)                   | 43 (6)                      | 43 (6)                      | 79                 | 14                 |
| No improvement strength after corticosteroid | 3 (1)                                                                | 35 (12)                 | 14 (2)                  | 43 (6)                      | 3                           | 43                 |                    |

Abbreviations: IIM=idiopathic inflammatory myopathies, UE=upper extremities, FF=finger flexors, LE=lower extremities, DM=dermatomyositis, AD=autoimmune disease, MCTD=mixed connective tissue disease, SLE=systemic lupus erythematosus

### Supplementary 3. International Myositis Classification Criteria Project questionnaire

| Item                                                                                                                                                               | Alternatives                                                                                                                                                                                                                                                                                                                                                                                                                                                                                                                                                                                                                                                                                                                                                                                                                                                                                                                          |
|--------------------------------------------------------------------------------------------------------------------------------------------------------------------|---------------------------------------------------------------------------------------------------------------------------------------------------------------------------------------------------------------------------------------------------------------------------------------------------------------------------------------------------------------------------------------------------------------------------------------------------------------------------------------------------------------------------------------------------------------------------------------------------------------------------------------------------------------------------------------------------------------------------------------------------------------------------------------------------------------------------------------------------------------------------------------------------------------------------------------|
| Have you received approval from your local IRB or ethics committee for participation in this project?                                                              | <input type="checkbox"/> Yes<br><input type="checkbox"/> Exempt<br><input type="checkbox"/> No                                                                                                                                                                                                                                                                                                                                                                                                                                                                                                                                                                                                                                                                                                                                                                                                                                        |
| Has your patient been diagnosed with the diagnosis relevant for this study for more than 6 months?<br>(A yes is required, if No select a new case)                 | <input type="checkbox"/> Yes<br><input type="checkbox"/> No                                                                                                                                                                                                                                                                                                                                                                                                                                                                                                                                                                                                                                                                                                                                                                                                                                                                           |
| Center (name of university or hospital from where data is entered)                                                                                                 |                                                                                                                                                                                                                                                                                                                                                                                                                                                                                                                                                                                                                                                                                                                                                                                                                                                                                                                                       |
| Clinician submitting case                                                                                                                                          |                                                                                                                                                                                                                                                                                                                                                                                                                                                                                                                                                                                                                                                                                                                                                                                                                                                                                                                                       |
| Case number                                                                                                                                                        |                                                                                                                                                                                                                                                                                                                                                                                                                                                                                                                                                                                                                                                                                                                                                                                                                                                                                                                                       |
| Gender                                                                                                                                                             | <input type="checkbox"/> Female<br><input type="checkbox"/> Male                                                                                                                                                                                                                                                                                                                                                                                                                                                                                                                                                                                                                                                                                                                                                                                                                                                                      |
| Age (years) at onset of first symptom assumed to be related to the disease                                                                                         |                                                                                                                                                                                                                                                                                                                                                                                                                                                                                                                                                                                                                                                                                                                                                                                                                                                                                                                                       |
| Age (years) at diagnosis                                                                                                                                           |                                                                                                                                                                                                                                                                                                                                                                                                                                                                                                                                                                                                                                                                                                                                                                                                                                                                                                                                       |
| Age (years) at last evaluation                                                                                                                                     |                                                                                                                                                                                                                                                                                                                                                                                                                                                                                                                                                                                                                                                                                                                                                                                                                                                                                                                                       |
| Ethnicity                                                                                                                                                          | <input type="checkbox"/> Caucasian<br><input type="checkbox"/> Of African descent<br><input type="checkbox"/> Of Asian descent<br><input type="checkbox"/> Of Native American descent<br><input type="checkbox"/> Of Pacific Island descent<br><input type="checkbox"/> Of Hispanic descent<br><input type="checkbox"/> Of Mixed descent<br><input type="checkbox"/> Unknown                                                                                                                                                                                                                                                                                                                                                                                                                                                                                                                                                          |
| Study diagnosis according to the clinician submitting the case                                                                                                     | <input type="checkbox"/> Idiopathic inflammatory myopathy (IIM) adults or children<br><input type="checkbox"/> Not Idiopathic inflammatory myopathy (Not IIM) adults or children                                                                                                                                                                                                                                                                                                                                                                                                                                                                                                                                                                                                                                                                                                                                                      |
| Study diagnosis: Idiopathic Inflammatory Myopathy (IIM) in adults or children                                                                                      | <input type="checkbox"/> Polymyositis<br><input type="checkbox"/> Dermatomyositis<br><input type="checkbox"/> Amyopathic dermatomyositis<br><input type="checkbox"/> Hypomyopathic dermatomyositis<br><input type="checkbox"/> Inclusion body myositis<br><input type="checkbox"/> Immune-mediated necrotizing myopathy<br><input type="checkbox"/> Juvenile dermatomyositis<br><input type="checkbox"/> Juvenile polymyositis<br><input type="checkbox"/> Other diagnosis, specify diagnosis below<br><input type="checkbox"/> Not Idiopathic Inflammatory Myopathy (IIM)                                                                                                                                                                                                                                                                                                                                                            |
| Not Idiopathic Inflammatory Myopathy (Not IIM), adults or children, but in which the diagnosis of idiopathic myositis was considered in the differential diagnosis | <input type="checkbox"/> Becker's dystrophy<br><input type="checkbox"/> Duchenne's dystrophy<br><input type="checkbox"/> Fascioscapulohumeral dystrophy<br><input type="checkbox"/> Limb-girdle dystrophy<br><input type="checkbox"/> Myotonic dystrophy<br><input type="checkbox"/> Non-inflammatory inclusion body myopathy<br><input type="checkbox"/> Other dystrophy, specify diagnosis<br><input type="checkbox"/> Dysferlinopathy<br><input type="checkbox"/> Acid maltase deficiency<br><input type="checkbox"/> Allergies<br><input type="checkbox"/> Bacterial myopathy<br><input type="checkbox"/> Carnitine deficiency<br><input type="checkbox"/> Celiac disease<br><input type="checkbox"/> Crohn's disease<br><input type="checkbox"/> Cushing syndrome<br><input type="checkbox"/> Cysticercosis<br><input type="checkbox"/> Diabetes mellitus<br><input type="checkbox"/> Drug or toxin associated myopathy, specify |

|                                                                 |                                                                                                                                                                                                                                                                                                                                                                                                                                                                                                                                                                                                                                                                                                                                                                                                                                                                                                                                                                                                                                                                                                                                                                                                                                                                                                                                                                                                                                                                                                                                                                                                                                                                                                                                                                                                                                                                                                                                                                                                                                                                                                                                                                                                                                                                                                                                                                                                                                                                                                                                                                                                                                                                                                                                                                                                                                                                                                                                                                                                                                                                                                                                                                                       |
|-----------------------------------------------------------------|---------------------------------------------------------------------------------------------------------------------------------------------------------------------------------------------------------------------------------------------------------------------------------------------------------------------------------------------------------------------------------------------------------------------------------------------------------------------------------------------------------------------------------------------------------------------------------------------------------------------------------------------------------------------------------------------------------------------------------------------------------------------------------------------------------------------------------------------------------------------------------------------------------------------------------------------------------------------------------------------------------------------------------------------------------------------------------------------------------------------------------------------------------------------------------------------------------------------------------------------------------------------------------------------------------------------------------------------------------------------------------------------------------------------------------------------------------------------------------------------------------------------------------------------------------------------------------------------------------------------------------------------------------------------------------------------------------------------------------------------------------------------------------------------------------------------------------------------------------------------------------------------------------------------------------------------------------------------------------------------------------------------------------------------------------------------------------------------------------------------------------------------------------------------------------------------------------------------------------------------------------------------------------------------------------------------------------------------------------------------------------------------------------------------------------------------------------------------------------------------------------------------------------------------------------------------------------------------------------------------------------------------------------------------------------------------------------------------------------------------------------------------------------------------------------------------------------------------------------------------------------------------------------------------------------------------------------------------------------------------------------------------------------------------------------------------------------------------------------------------------------------------------------------------------------------|
|                                                                 | <p>diagnosis</p> <ul style="list-style-type: none"> <li><input type="checkbox"/> Exogenous steroid myopathy</li> <li><input type="checkbox"/> Familial periodic paralysis</li> <li><input type="checkbox"/> Fibromyalgia</li> <li><input type="checkbox"/> Filiarisis</li> <li><input type="checkbox"/> Glucocorticoid induced myopathy</li> <li><input type="checkbox"/> Gullain-Barre syndrome</li> <li><input type="checkbox"/> Hypercalcemia</li> <li><input type="checkbox"/> Hypereosinophilic syndrome</li> <li><input type="checkbox"/> Hypersensitivity conditions</li> <li><input type="checkbox"/> Hyperthyroidism</li> <li><input type="checkbox"/> Hypocalcemia</li> <li><input type="checkbox"/> Hypokalemia</li> <li><input type="checkbox"/> Hypothyroidism</li> <li><input type="checkbox"/> Immune mediated skin conditions, specify diagnosis below</li> <li><input type="checkbox"/> Juvenile idiopathic arthritis</li> <li><input type="checkbox"/> Kearns-Sayre syndrome</li> <li><input type="checkbox"/> Mc Ardle’s disease</li> <li><input type="checkbox"/> Metabolic myopathy, specify diagnosis</li> <li><input type="checkbox"/> Mitochondrial encephalomyopathy, lactic acidosis, stroke (MELAS)</li> <li><input type="checkbox"/> Mitochondrial myopathy, specify diagnosis</li> <li><input type="checkbox"/> Mixed connective tissue disease</li> <li><input type="checkbox"/> Motor neuron diseases, specify diagnosis</li> <li><input type="checkbox"/> Multiple sclerosis</li> <li><input type="checkbox"/> Myasthenia gravis</li> <li><input type="checkbox"/> Myoadenylate deaminase deficiency</li> <li><input type="checkbox"/> Myoclonic epilepsy, ragged red fibers (MERRF)</li> <li><input type="checkbox"/> Palmityltransferase deficiency</li> <li><input type="checkbox"/> Parasitic myopathy</li> <li><input type="checkbox"/> Phosphofructokinase deficiency</li> <li><input type="checkbox"/> Psoriasis</li> <li><input type="checkbox"/> Seborhheic dermatitis</li> <li><input type="checkbox"/> Statin induced myopathy</li> <li><input type="checkbox"/> Systemic lupus erythematosus (SLE)</li> <li><input type="checkbox"/> Systemic sclerosis</li> <li><input type="checkbox"/> Systemic vasculitis, specify diagnosis below</li> <li><input type="checkbox"/> Toxoplasmosis</li> <li><input type="checkbox"/> Trichinosis</li> <li><input type="checkbox"/> Trypanasoma</li> <li><input type="checkbox"/> Ulcerative colitis</li> <li><input type="checkbox"/> Verrucae vulgaris</li> <li><input type="checkbox"/> Viral myopathy</li> <br/> <li><input type="checkbox"/> Other dermatologic disease, specify diagnosis below</li> <li><input type="checkbox"/> Other endocrine myopathy, specify diagnosis</li> <li><input type="checkbox"/> Other infectious myopathy, specify diagnosis</li> <li><input type="checkbox"/> Other neuromuscular disease, specify diagnosis below</li> <li><input type="checkbox"/> Other systemic autoimmune disease, specify diagnosis below</li> <li><input type="checkbox"/> Other diagnosis, specify</li> <li><input type="checkbox"/> None applicable (Inflammatory Myopathy)</li> </ul> |
| <p>Basis for study diagnosis (check all supporting reasons)</p> | <ul style="list-style-type: none"> <li><input type="checkbox"/> Muscle weakness</li> <li><input type="checkbox"/> Muscle biopsy abnormalities</li> <li><input type="checkbox"/> Elevated muscle enzymes</li> <li><input type="checkbox"/> EMG abnormalities</li> <li><input type="checkbox"/> Rashes</li> </ul>                                                                                                                                                                                                                                                                                                                                                                                                                                                                                                                                                                                                                                                                                                                                                                                                                                                                                                                                                                                                                                                                                                                                                                                                                                                                                                                                                                                                                                                                                                                                                                                                                                                                                                                                                                                                                                                                                                                                                                                                                                                                                                                                                                                                                                                                                                                                                                                                                                                                                                                                                                                                                                                                                                                                                                                                                                                                       |

|                                                                                             |                                                                                                                                                                                                                                                                                                                                                                                                                                                                                                                                                                                                   |
|---------------------------------------------------------------------------------------------|---------------------------------------------------------------------------------------------------------------------------------------------------------------------------------------------------------------------------------------------------------------------------------------------------------------------------------------------------------------------------------------------------------------------------------------------------------------------------------------------------------------------------------------------------------------------------------------------------|
|                                                                                             | <input type="checkbox"/> Skin biopsy<br><input type="checkbox"/> Autoantibodies<br><input type="checkbox"/> MRI<br><input type="checkbox"/> Other, please specify                                                                                                                                                                                                                                                                                                                                                                                                                                 |
| Other diagnoses in this case: (check all that apply)                                        | <input type="checkbox"/> Non applicable<br><input type="checkbox"/> Systemic sclerosis<br><input type="checkbox"/> Sjögren´s syndrome<br><input type="checkbox"/> Mixed connective tissue disease<br><input type="checkbox"/> Rheumatoid arthritis<br><input type="checkbox"/> Systemic lupus erythematosus<br><input type="checkbox"/> Hypothyroidism<br><input type="checkbox"/> Hyperthyroidism<br><input type="checkbox"/> Type I diabetes<br><input type="checkbox"/> Juvenile idiopathic arthritis<br><input type="checkbox"/> Malignancy<br><input type="checkbox"/> Other, please specify |
| <i>Clinical Muscle Variables – present at any time during the disease course</i>            |                                                                                                                                                                                                                                                                                                                                                                                                                                                                                                                                                                                                   |
| 1M. Objective symmetric weakness, usually progressive, of the proximal upper extremities    | <input type="checkbox"/> Present<br><input type="checkbox"/> Absent<br><input type="checkbox"/> Information not available<br><input type="checkbox"/> Comments                                                                                                                                                                                                                                                                                                                                                                                                                                    |
| 2M. Objective shoulder abductor weakness                                                    | <input type="checkbox"/> Present<br><input type="checkbox"/> Absent<br><input type="checkbox"/> Information not available<br><input type="checkbox"/> Comments                                                                                                                                                                                                                                                                                                                                                                                                                                    |
| 3M. Objective elbow flexor weakness                                                         | <input type="checkbox"/> Present<br><input type="checkbox"/> Absent<br><input type="checkbox"/> Information not available<br><input type="checkbox"/> Comments                                                                                                                                                                                                                                                                                                                                                                                                                                    |
| 4M. Objective elbow extensor weakness                                                       | <input type="checkbox"/> Present<br><input type="checkbox"/> Absent<br><input type="checkbox"/> Information not available<br><input type="checkbox"/> Comments                                                                                                                                                                                                                                                                                                                                                                                                                                    |
| 5M. Wrist and finger flexors are relatively weaker than shoulder abductors on the same side | <input type="checkbox"/> Present<br><input type="checkbox"/> Absent<br><input type="checkbox"/> Information not available<br><input type="checkbox"/> Comments                                                                                                                                                                                                                                                                                                                                                                                                                                    |
| 6M. Wrist flexors are relatively weaker than wrist extensors on the same side               | <input type="checkbox"/> Present<br><input type="checkbox"/> Absent<br><input type="checkbox"/> Information not available<br><input type="checkbox"/> Comments                                                                                                                                                                                                                                                                                                                                                                                                                                    |
| 7M. Objective finger flexor weakness                                                        | <input type="checkbox"/> Present<br><input type="checkbox"/> Absent<br><input type="checkbox"/> Information not available<br><input type="checkbox"/> Comments                                                                                                                                                                                                                                                                                                                                                                                                                                    |
| 8M. Objective symmetric weakness, usually progressive, of the proximal lower extremities    | <input type="checkbox"/> Present<br><input type="checkbox"/> Absent<br><input type="checkbox"/> Information not available<br><input type="checkbox"/> Comments                                                                                                                                                                                                                                                                                                                                                                                                                                    |
| 9M. Objective hip flexor weakness                                                           | <input type="checkbox"/> Present<br><input type="checkbox"/> Absent<br><input type="checkbox"/> Information not available<br><input type="checkbox"/> Comments                                                                                                                                                                                                                                                                                                                                                                                                                                    |
| 10M. Objective hip abductor weakness                                                        | <input type="checkbox"/> Present<br><input type="checkbox"/> Absent<br><input type="checkbox"/> Information not available<br><input type="checkbox"/> Comments                                                                                                                                                                                                                                                                                                                                                                                                                                    |

|                                                                                              |                                                                                                                                                                |
|----------------------------------------------------------------------------------------------|----------------------------------------------------------------------------------------------------------------------------------------------------------------|
| 11M. Objective knee extensor weakness                                                        | <input type="checkbox"/> Present<br><input type="checkbox"/> Absent<br><input type="checkbox"/> Information not available<br><input type="checkbox"/> Comments |
| 12M. Knee extensors are as weak or relatively weaker than hip girdle muscle on the same side | <input type="checkbox"/> Present<br><input type="checkbox"/> Absent<br><input type="checkbox"/> Information not available<br><input type="checkbox"/> Comments |
| 13M. Objective muscle weakness of distal lower extremities                                   | <input type="checkbox"/> Present<br><input type="checkbox"/> Absent<br><input type="checkbox"/> Information not available<br><input type="checkbox"/> Comments |
| 14M. Objective axial weakness                                                                | <input type="checkbox"/> Present<br><input type="checkbox"/> Absent<br><input type="checkbox"/> Information not available<br><input type="checkbox"/> Comments |
| 15M. Objective neck flexor weakness                                                          | <input type="checkbox"/> Present<br><input type="checkbox"/> Absent<br><input type="checkbox"/> Information not available<br><input type="checkbox"/> Comments |
| 16M. Neck flexors are relatively weaker than neck extensors                                  | <input type="checkbox"/> Present<br><input type="checkbox"/> Absent<br><input type="checkbox"/> Information not available<br><input type="checkbox"/> Comments |
| 17M. In the legs proximal muscles are relatively weaker than distal muscles                  | <input type="checkbox"/> Present<br><input type="checkbox"/> Absent<br><input type="checkbox"/> Information not available<br><input type="checkbox"/> Comments |
| 18M. In the arms proximal muscles are relatively weaker than distal muscles                  | <input type="checkbox"/> Present<br><input type="checkbox"/> Absent<br><input type="checkbox"/> Information not available<br><input type="checkbox"/> Comments |
| 19M In the legs distal muscles relatively weaker than proximal muscles                       | <input type="checkbox"/> Present<br><input type="checkbox"/> Absent<br><input type="checkbox"/> Information not available<br><input type="checkbox"/> Comments |
| 20M In the arms distal muscles are relatively weaker than proximal muscles                   | <input type="checkbox"/> Present<br><input type="checkbox"/> Absent<br><input type="checkbox"/> Information not available<br><input type="checkbox"/> Comments |
| 21M. Muscle tenderness                                                                       | <input type="checkbox"/> Present<br><input type="checkbox"/> Absent<br><input type="checkbox"/> Information not available<br><input type="checkbox"/> Comments |
| 22M. Muscle atrophy of distal forearms                                                       | <input type="checkbox"/> Present<br><input type="checkbox"/> Absent<br><input type="checkbox"/> Information not available<br><input type="checkbox"/> Comments |
| 23M. Muscle atrophy of thighs                                                                | <input type="checkbox"/> Present<br><input type="checkbox"/> Absent<br><input type="checkbox"/> Information not available<br><input type="checkbox"/> Comments |
| <i>Skin Variables – present at any time during the disease course</i>                        |                                                                                                                                                                |
| 1S. Heliotrope rash                                                                          | <input type="checkbox"/> Present<br><input type="checkbox"/> Absent<br><input type="checkbox"/> Information not available<br><input type="checkbox"/> Comments |

|                                                                                 |                                                                                                                                                                |
|---------------------------------------------------------------------------------|----------------------------------------------------------------------------------------------------------------------------------------------------------------|
| 2S. Gottron's papules                                                           | <input type="checkbox"/> Present<br><input type="checkbox"/> Absent<br><input type="checkbox"/> Information not available<br><input type="checkbox"/> Comments |
| 3S. Gottron's sign                                                              | <input type="checkbox"/> Present<br><input type="checkbox"/> Absent<br><input type="checkbox"/> Information not available<br><input type="checkbox"/> Comments |
| 4S. Erythema of the back of neck and shoulders (Shawl sign)                     | <input type="checkbox"/> Present<br><input type="checkbox"/> Absent<br><input type="checkbox"/> Information not available<br><input type="checkbox"/> Comments |
| 5S. Erythema of the neck (V-sign)                                               | <input type="checkbox"/> Present<br><input type="checkbox"/> Absent<br><input type="checkbox"/> Information not available<br><input type="checkbox"/> Comments |
| 6S. Periorbital edema                                                           | <input type="checkbox"/> Present<br><input type="checkbox"/> Absent<br><input type="checkbox"/> Information not available<br><input type="checkbox"/> Comments |
| 7S. Linear extensor erythema                                                    | <input type="checkbox"/> Present<br><input type="checkbox"/> Absent<br><input type="checkbox"/> Information not available<br><input type="checkbox"/> Comments |
| 8S. Calcification                                                               | <input type="checkbox"/> Present<br><input type="checkbox"/> Absent<br><input type="checkbox"/> Information not available<br><input type="checkbox"/> Comments |
| 9S. Periungual erythema or nailfold capillary abnormality                       | <input type="checkbox"/> Present<br><input type="checkbox"/> Absent<br><input type="checkbox"/> Information not available<br><input type="checkbox"/> Comments |
| 10S. Mechanic's hands                                                           | <input type="checkbox"/> Present<br><input type="checkbox"/> Absent<br><input type="checkbox"/> Information not available<br><input type="checkbox"/> Comments |
| 11S. Photodistributed violaceous erythema                                       | <input type="checkbox"/> Present<br><input type="checkbox"/> Absent<br><input type="checkbox"/> Information not available<br><input type="checkbox"/> Comments |
| 12 S. Raynaud's phenomenon                                                      | <input type="checkbox"/> Present<br><input type="checkbox"/> Absent<br><input type="checkbox"/> Information not available<br><input type="checkbox"/> Comments |
| 13S. Cuticular overgrowth                                                       | <input type="checkbox"/> Present<br><input type="checkbox"/> Absent<br><input type="checkbox"/> Information not available<br><input type="checkbox"/> Comments |
| 14S Poikiloderma                                                                | <input type="checkbox"/> Present<br><input type="checkbox"/> Absent<br><input type="checkbox"/> Information not available<br><input type="checkbox"/> Comments |
| <i>Other Clinical Variables – present at any time during the disease course</i> |                                                                                                                                                                |
| 1O. Family history of autoimmune disease (see Appendix A)                       | <input type="checkbox"/> Present<br><input type="checkbox"/> Absent<br><input type="checkbox"/> Information not available<br><input type="checkbox"/> Comments |



|                                                                                                                                                                                                                                                                                                                                                                                        |                                                                                                                                                                                                  |
|----------------------------------------------------------------------------------------------------------------------------------------------------------------------------------------------------------------------------------------------------------------------------------------------------------------------------------------------------------------------------------------|--------------------------------------------------------------------------------------------------------------------------------------------------------------------------------------------------|
| 2O. Family history of muscle disease (See Appendix B)                                                                                                                                                                                                                                                                                                                                  | <input type="checkbox"/> Present<br><input type="checkbox"/> Absent<br><input type="checkbox"/> Information not available<br><input type="checkbox"/> Comments                                   |
| 3Oa. Acute onset (days to 2 weeks) of symptoms                                                                                                                                                                                                                                                                                                                                         | <input type="checkbox"/> Present<br><input type="checkbox"/> Absent<br><input type="checkbox"/> Information not available<br><input type="checkbox"/> Comments                                   |
| 3Ob. Subacute onset (> 2 weeks to ≤2 months) of symptoms                                                                                                                                                                                                                                                                                                                               | <input type="checkbox"/> Present<br><input type="checkbox"/> Absent<br><input type="checkbox"/> Information not available<br><input type="checkbox"/> Comments                                   |
| 3Oc. Insidious onset of symptoms > 2 months to years                                                                                                                                                                                                                                                                                                                                   | <input type="checkbox"/> Present<br><input type="checkbox"/> Absent<br><input type="checkbox"/> Information not available<br><input type="checkbox"/> Comments                                   |
| 4O. History of episodic weakness associated with exercise or fasting                                                                                                                                                                                                                                                                                                                   | <input type="checkbox"/> Present<br><input type="checkbox"/> Absent<br><input type="checkbox"/> Information not available<br><input type="checkbox"/> Comments                                   |
| 5O. Arthritis                                                                                                                                                                                                                                                                                                                                                                          | <input type="checkbox"/> Present<br><input type="checkbox"/> Absent<br><input type="checkbox"/> Information not available<br><input type="checkbox"/> Comments                                   |
| 6O. Polyarthralgia                                                                                                                                                                                                                                                                                                                                                                     | <input type="checkbox"/> Present<br><input type="checkbox"/> Absent<br><input type="checkbox"/> Information not available<br><input type="checkbox"/> Comments                                   |
| 7O. Joint contractures                                                                                                                                                                                                                                                                                                                                                                 | <input type="checkbox"/> Present<br><input type="checkbox"/> Absent<br><input type="checkbox"/> Information not available<br><input type="checkbox"/> Comments                                   |
| 8O. Unexplained Fevers                                                                                                                                                                                                                                                                                                                                                                 | <input type="checkbox"/> Present<br><input type="checkbox"/> Absent<br><input type="checkbox"/> Information not available<br><input type="checkbox"/> Comments                                   |
| 9O. Interstitial lung disease                                                                                                                                                                                                                                                                                                                                                          | <input type="checkbox"/> Present<br><input type="checkbox"/> Absent<br><input type="checkbox"/> Information not available<br><input type="checkbox"/> Comments                                   |
| 1O. Dysphagia or esophageal dysmotility                                                                                                                                                                                                                                                                                                                                                | <input type="checkbox"/> Present<br><input type="checkbox"/> Absent<br><input type="checkbox"/> Information not available<br><input type="checkbox"/> Comments                                   |
| 13O. Objective improvement in strength or other disease manifestation after an adequate trial of glucocorticoids and/or other immunosuppressive or immune modulating therapy for at least 8 w. Check all that apply.<br>- prednisone ≥0.75-2 mg/kg/day (or equivalent)<br>- methotrexate ≥10 mg/week (children: ≥0.3 mg/kg/week)<br>- azathioprine 75 mg/d (or 2 mg/kg/day)<br>- Other | <input type="checkbox"/> Improved<br><input type="checkbox"/> Not improved<br><input type="checkbox"/> Unknown<br><input type="checkbox"/> Inadequate trial<br><input type="checkbox"/> Not used |
| <i>Muscle Biopsy Variables – from any biopsy</i>                                                                                                                                                                                                                                                                                                                                       |                                                                                                                                                                                                  |
| Muscle biopsy performed                                                                                                                                                                                                                                                                                                                                                                | <input type="checkbox"/> Yes<br><input type="checkbox"/> No                                                                                                                                      |

|                                                                                                                                   |                                                                                                                                                                |
|-----------------------------------------------------------------------------------------------------------------------------------|----------------------------------------------------------------------------------------------------------------------------------------------------------------|
| 1B. Necrosis of type I and type II muscle fibers, phagocytosis, degeneration of myofibers                                         | <input type="checkbox"/> Present<br><input type="checkbox"/> Absent<br><input type="checkbox"/> Information not available<br><input type="checkbox"/> Comments |
| 2B. Regeneration of myofibers                                                                                                     | <input type="checkbox"/> Present<br><input type="checkbox"/> Absent<br><input type="checkbox"/> Information not available<br><input type="checkbox"/> Comments |
| 3B. Endomysial infiltration of mononuclear cells surrounding, but not invading, myofibers                                         | <input type="checkbox"/> Present<br><input type="checkbox"/> Absent<br><input type="checkbox"/> Information not available<br><input type="checkbox"/> Comments |
| 4B. Non-necrotic fibers surrounded and invaded by mononuclear cells                                                               | <input type="checkbox"/> Present<br><input type="checkbox"/> Absent<br><input type="checkbox"/> Information not available<br><input type="checkbox"/> Comments |
| 5B. Perimysial and/or perivascular infiltration of mononuclear cells                                                              | <input type="checkbox"/> Present<br><input type="checkbox"/> Absent<br><input type="checkbox"/> Information not available<br><input type="checkbox"/> Comments |
| 6B. Perifascicular atrophy                                                                                                        | <input type="checkbox"/> Present<br><input type="checkbox"/> Absent<br><input type="checkbox"/> Information not available<br><input type="checkbox"/> Comments |
| 7B. Vacuolated muscle fibers                                                                                                      | <input type="checkbox"/> Present<br><input type="checkbox"/> Absent<br><input type="checkbox"/> Information not available<br><input type="checkbox"/> Comments |
| 8B. Rimmed vacuoles                                                                                                               | <input type="checkbox"/> Present<br><input type="checkbox"/> Absent<br><input type="checkbox"/> Information not available<br><input type="checkbox"/> Comments |
| 9B. Ragged red fibers, or cytochrome C oxidase-negative fibers                                                                    | <input type="checkbox"/> Present<br><input type="checkbox"/> Absent<br><input type="checkbox"/> Information not available<br><input type="checkbox"/> Comments |
| 10B. Many necrotic muscle fibers as the predominant feature. Inflammatory cells are sparse; perimysial infiltrate is not evident. | <input type="checkbox"/> Present<br><input type="checkbox"/> Absent<br><input type="checkbox"/> Information not available<br><input type="checkbox"/> Comments |
| 11. Immunohistochemistry data available                                                                                           | <input type="checkbox"/> Yes<br><input type="checkbox"/> No                                                                                                    |
| 12B. MHC Class I antigen present on scattered or more muscle fibers                                                               | <input type="checkbox"/> Present<br><input type="checkbox"/> Absent<br><input type="checkbox"/> Information not available<br><input type="checkbox"/> Comments |
| 13B. Endomysial CD8+ cells surrounding myofibers with MHC Class I expression on myofibers                                         | <input type="checkbox"/> Present<br><input type="checkbox"/> Absent<br><input type="checkbox"/> Information not available<br><input type="checkbox"/> Comments |
| 14B. Membrane attack complex (MAC) depositions on small blood vessels                                                             | <input type="checkbox"/> Present<br><input type="checkbox"/> Absent<br><input type="checkbox"/> Information not available<br><input type="checkbox"/> Comments |
| 15B. Reduced capillary density                                                                                                    | <input type="checkbox"/> Present<br><input type="checkbox"/> Absent<br><input type="checkbox"/> Information not available<br><input type="checkbox"/> Comments |

|                                                                                                                                                                                                                                                           |                                                                                                                                                                |
|-----------------------------------------------------------------------------------------------------------------------------------------------------------------------------------------------------------------------------------------------------------|----------------------------------------------------------------------------------------------------------------------------------------------------------------|
| 16B. MHC-1 expression of perifascicular fibers                                                                                                                                                                                                            | <input type="checkbox"/> Present<br><input type="checkbox"/> Absent<br><input type="checkbox"/> Information not available<br><input type="checkbox"/> Comments |
| 17B. Electron microscopy available                                                                                                                                                                                                                        | <input type="checkbox"/> Yes<br><input type="checkbox"/> No                                                                                                    |
| 18B. Tubuloreticular inclusions in endothelial cells on electron microscopy                                                                                                                                                                               | <input type="checkbox"/> Present<br><input type="checkbox"/> Absent<br><input type="checkbox"/> Information not available<br><input type="checkbox"/> Comments |
| 19B. Intracellular amyloid deposits                                                                                                                                                                                                                       | <input type="checkbox"/> Present<br><input type="checkbox"/> Absent<br><input type="checkbox"/> Information not available<br><input type="checkbox"/> Comments |
| 20B.15-18 nm tubulofilaments by electron microscopy (EM)                                                                                                                                                                                                  | <input type="checkbox"/> Present<br><input type="checkbox"/> Absent<br><input type="checkbox"/> Information not available<br><input type="checkbox"/> Comments |
| <i>Laboratory Variables – record the most abnormal test values during the disease course</i>                                                                                                                                                              |                                                                                                                                                                |
| 1L. Serum creatine kinase (CK) activity                                                                                                                                                                                                                   | <input type="checkbox"/> Value<br><input type="checkbox"/> Upper normal limit<br><input type="checkbox"/> Units                                                |
| 2L. Serum lactate dehydrogenase (LDH) activity                                                                                                                                                                                                            | <input type="checkbox"/> Value<br><input type="checkbox"/> Upper normal limit<br><input type="checkbox"/> Units                                                |
| 3L. Serum aspartate aminotransferase (ASAT/AST/SGOT) activity                                                                                                                                                                                             | <input type="checkbox"/> Value<br><input type="checkbox"/> Upper normal limit<br><input type="checkbox"/> Units                                                |
| 4L. Serum alanine aminotransferase (ALAT/ALT/SGPT) activity                                                                                                                                                                                               | <input type="checkbox"/> Value<br><input type="checkbox"/> Upper normal limit<br><input type="checkbox"/> Units                                                |
| 5L. Serum Aldolase activity                                                                                                                                                                                                                               | <input type="checkbox"/> Value<br><input type="checkbox"/> Upper normal limit<br><input type="checkbox"/> Units                                                |
| 6L. Erythrocyte sedimentation rate (ESR)                                                                                                                                                                                                                  | <input type="checkbox"/> Value<br><input type="checkbox"/> Upper normal limit<br><input type="checkbox"/> Units                                                |
| 7L. C-reactive protein (CRP)                                                                                                                                                                                                                              | <input type="checkbox"/> Value<br><input type="checkbox"/> Upper normal limit<br><input type="checkbox"/> Units                                                |
| Autoantibody tests available                                                                                                                                                                                                                              | <input type="checkbox"/> Yes<br><input type="checkbox"/> No                                                                                                    |
| 9L. Autoantibodies<br>ANA<br>Anti-Jo-1 (anti-His)<br>Anti-Mi-2<br>Anti-SRP<br>Anti-Ku<br>Anti- PL7<br>Anti- PL-12<br>Anti PM-Scl<br>Anti-SSA<br>Anti-Ro52/SSA<br>Anti-Ro60/SSA<br>Anti-La/SSB<br>Anti-ribonucleoprotein (RNP)-70K (U1snRNP)<br>Anti-RNP-A | <input type="checkbox"/> Present<br><input type="checkbox"/> Absent<br><input type="checkbox"/> Information not available<br><input type="checkbox"/> Comments |

|                                                                                                                                                                                      |                                                                                                                                                                |
|--------------------------------------------------------------------------------------------------------------------------------------------------------------------------------------|----------------------------------------------------------------------------------------------------------------------------------------------------------------|
| Anti-RNP-C<br>Anti-Centromere B (ACA)<br>Anti-Topoisomerase-1/Scl70,<br>Anti-Ribosomal P antigen<br>Anti-Sm<br>Anti-SmB<br>Anti-SmD<br>RF<br>Anti-CCP<br>Other, please specify below |                                                                                                                                                                |
| EMG performed                                                                                                                                                                        | <input type="checkbox"/> Yes<br><input type="checkbox"/> No                                                                                                    |
| 1. Electromyogram (EMG) - Increased insertional and spontaneous activity in the form of fibrillation potentials, positive sharp waves, or complex repetitive discharges              | <input type="checkbox"/> Present<br><input type="checkbox"/> Absent<br><input type="checkbox"/> Information not available<br><input type="checkbox"/> Comments |
| 1L. EMG - Morphometric analysis reveals the presence of short duration, small amplitude, polyphasic motor unit action potentials (MUAPs)                                             | <input type="checkbox"/> Present<br><input type="checkbox"/> Absent<br><input type="checkbox"/> Information not available<br><input type="checkbox"/> Comments |
| MRI of muscles performed                                                                                                                                                             | <input type="checkbox"/> Yes<br><input type="checkbox"/> No                                                                                                    |
| 1. Muscle edema on STIR or T2-weighted magnetic resonance imaging (MRI)                                                                                                              | <input type="checkbox"/> Present<br><input type="checkbox"/> Absent<br><input type="checkbox"/> Information not available<br><input type="checkbox"/> Comments |
| 2. Muscle atrophy and/or increased muscle fat content on T1-weighted MRI scanning consistent with myositis                                                                           | <input type="checkbox"/> Present<br><input type="checkbox"/> Absent<br><input type="checkbox"/> Information not available<br><input type="checkbox"/> Comments |
| 13L. Skin biopsy compatible with dermatomyositis (or lupus)                                                                                                                          | <input type="checkbox"/> Present<br><input type="checkbox"/> Absent<br><input type="checkbox"/> Information not available<br><input type="checkbox"/> Comments |
| Other features important in making the diagnosis not listed above – please specify                                                                                                   |                                                                                                                                                                |
| Other laboratory features important in making the diagnosis not listed above – please specify                                                                                        |                                                                                                                                                                |

**Supplementary 4.** Glossary and definitions for the International Myositis Classification  
Criteria Project questionnaire [30, 31]

The variables in italics have been included in previous sets of criteria for inflammatory myopathies

| <b>Clinical Muscle Variables – present at any time during the disease course</b>                   | <b>Definition</b>                                                                                                                                                                   |
|----------------------------------------------------------------------------------------------------|-------------------------------------------------------------------------------------------------------------------------------------------------------------------------------------|
| <i>1M. Objective symmetric weakness, usually progressive, of the proximal upper extremities</i>    | Weakness of proximal upper extremities as defined by manual muscle testing or other objective strength testing, which is present on both sides and is usually progressive over time |
| <i>2M. Objective shoulder abductor weakness</i>                                                    | Weakness of the shoulder abductors as defined by manual muscle testing or other objective strength testing                                                                          |
| <i>3M. Objective elbow flexor weakness</i>                                                         | Weakness of the elbow flexors as defined by manual muscle testing or other objective strength testing                                                                               |
| <i>4M. Objective elbow extensor weakness</i>                                                       | Weakness of the elbow extensors as defined by manual muscle testing or other objective strength testing                                                                             |
| <i>5M. Wrist and finger flexors are relatively weaker than shoulder abductors on the same side</i> | Muscle grades for wrist and finger flexors are relatively lower than for shoulder abductors, as defined by manual muscle testing or other objective strength testing                |
| <i>6M. Wrist flexors are relatively weaker than wrist extensors on the same side</i>               | Muscle grades for wrist flexors are relatively lower than for wrist extensors as defined by manual muscle testing or other objective strength testing                               |
| <i>7M. Objective finger flexor weakness</i>                                                        | Finger flexor weakness as defined by manual muscle testing or other objective strength testing                                                                                      |
| <i>8M. Objective symmetric weakness, usually progressive, of the proximal lower extremities</i>    | Weakness of proximal lower extremities as defined by manual muscle testing or other objective strength testing, which is present on both sides and is usually progressive over time |
| <i>9M. Objective hip flexor weakness</i>                                                           | Weakness of the hip flexors as defined by manual muscle testing or other objective strength testing                                                                                 |
| <i>10M. Objective hip abductor weakness</i>                                                        | Weakness of the hip abductors as defined by manual muscle testing or other objective strength testing                                                                               |
| <i>11M. Objective knee extensor weakness</i>                                                       | Weakness of the knee extensors as defined by manual muscle testing or other objective strength testing                                                                              |
| 12M. Knee extensors are as weak or relatively weaker than hip girdle muscles on the same side      | Muscle grades for knee extensors are comparable to or weaker than for hip girdle muscles on the same side, as defined by manual muscle testing or other objective strength testing  |
| 13M. Objective muscle weakness of distal lower extremities                                         | Weakness of distal lower extremities as defined by manual muscle testing or other objective strength testing or functional testing (e.g., ability to walk on heels or tip toes)     |
| <i>14M. Objective axial weakness</i>                                                               | Weakness of axial muscles, including neck flexors and extensors, abdominal and trunk muscles, as defined by manual muscle testing or other objective strength testing               |
| 15M. Objective neck flexor weakness                                                                | Weakness of the neck flexors as defined by manual muscle testing or other objective strength testing                                                                                |
| <i>16M. Neck flexors are relatively weaker than neck extensors</i>                                 | Muscle grades for neck flexors are relatively lower than neck extensors as defined by manual muscle testing or other objective strength testing                                     |
| <i>17M. In the legs proximal muscles are</i>                                                       | Muscle grades for proximal muscles in the legs are                                                                                                                                  |

|                                                                                    |                                                                                                                                                                                                                                                                |
|------------------------------------------------------------------------------------|----------------------------------------------------------------------------------------------------------------------------------------------------------------------------------------------------------------------------------------------------------------|
| <i>relatively weaker than distal muscles</i>                                       | relatively lower than distal muscles in the legs as defined by manual muscle testing or other objective strength testing                                                                                                                                       |
| <i>18M. In the arms proximal muscles are relatively weaker than distal muscles</i> | Muscle grades for proximal muscles in the arms are relatively lower than distal muscles in the arms as defined by manual muscle testing or other objective strength testing                                                                                    |
| 19M In the legs distal muscles are relatively weaker than proximal muscles         | Distal muscles in the legs are relatively weaker than proximal muscles in the legs as defined by manual muscle testing or other objective strength testing                                                                                                     |
| 20M In the arms distal muscles are relatively weaker than proximal muscles         | Distal muscles in the arms are relatively weaker than proximal muscles in the arms as defined by manual muscle testing or other objective strength testing                                                                                                     |
| 21M. Muscle tenderness                                                             | Pain in any muscle induced by squeezing or palpating the muscle                                                                                                                                                                                                |
| 22M. Muscle atrophy of distal forearms                                             | Objective clinical evidence by physical exam of decreased distal forearm muscle mass                                                                                                                                                                           |
| 23M. Muscle atrophy of thighs                                                      | Objective clinical evidence by physical exam of decreased thigh muscle mass                                                                                                                                                                                    |
| <b>Skin Variables – present at any time during the disease course</b>              | <b>Definition</b>                                                                                                                                                                                                                                              |
| <i>1S. Heliotrope rash</i>                                                         | Purple, lilac-colored or erythematous patches over the eyelids or in a periorbital distribution, often associated with periorbital edema                                                                                                                       |
| <i>2S. Gottron’s papules</i>                                                       | Erythematous to violaceous papules over the extensor surfaces of joints, which are sometimes scaly. May occur over the finger joints, elbows, knees, malleoli and toes.                                                                                        |
| <i>3S. Gottron’s sign</i>                                                          | Erythematous to violaceous macules over the extensor surfaces of joints, which are not palpable                                                                                                                                                                |
| <i>4S. Erythema of the back of the neck and shoulders (Shawl sign)</i>             | Confluent erythema around the posterior base of the neck, back and upper shoulders, often in the distribution of a shawl                                                                                                                                       |
| <i>5S. Erythema of the neck (V-sign)</i>                                           | Confluent erythema around the anterior base of the neck and the upper chest, often in the shape of a “V”                                                                                                                                                       |
| <i>6S. Periorbital edema</i>                                                       | Swelling around the one or both orbits                                                                                                                                                                                                                         |
| 7S. Linear extensor erythema                                                       | Erythema specifically located over the extensor tendon sheaths of the hands, forearms, feet and/or forelegs                                                                                                                                                    |
| 8S. Calcification                                                                  | Dystrophic calcium deposits, observed clinically or by imaging, which involves the skin, subcutaneous tissue, fascia or muscle                                                                                                                                 |
| 9S. Periungual erythema or nailfold capillary abnormality                          | Erythema proximal to the nail bed or dilatation of periungual capillaries, which may be accompanied by vessel dropout or tortuosity, and which is visible by naked eye examination or with magnification such as with otoscopy or by use of the ophthalmoscope |
| 10S. Mechanic’s hands                                                              | Scaling or cracking of the skin over the lateral or palmar aspects of the fingers or thumbs                                                                                                                                                                    |
| 11S. Photodistributed violaceous erythema                                          | Erythema over the face which may be isolated malar erythema, but may include more extensive erythema including periorbital, chin, temporal, ear and frontal regions                                                                                            |
| 12S. Raynaud’s phenomenon                                                          | Discoloration of fingertips or other acral areas (two or three colors) to emotion or cold                                                                                                                                                                      |

|                                                                                                                                                                                                           |                                                                                                                                                                                                                                                                                                                                                                                                     |
|-----------------------------------------------------------------------------------------------------------------------------------------------------------------------------------------------------------|-----------------------------------------------------------------------------------------------------------------------------------------------------------------------------------------------------------------------------------------------------------------------------------------------------------------------------------------------------------------------------------------------------|
| 13S. Cuticular overgrowth                                                                                                                                                                                 | Enlargement or overgrowth of the cuticle onto the nailbed                                                                                                                                                                                                                                                                                                                                           |
| 14S. Poikiloderma                                                                                                                                                                                         | A fine speckled pattern of hyperpigmented and hypopigmented macules interspersed with fine teleangiectasia and cutaneous atrophy                                                                                                                                                                                                                                                                    |
| <b>Other Clinical Variables – present at any time during the disease course</b>                                                                                                                           | <b>Definition</b>                                                                                                                                                                                                                                                                                                                                                                                   |
| 1O. Family history of autoimmune disease                                                                                                                                                                  | Patient history or documentation that one or more of the diseases listed in Appendix A were diagnosed in a blood relative.                                                                                                                                                                                                                                                                          |
| 2O. Family history of muscle disease                                                                                                                                                                      | Patient history or documentation that one or more of the diseases listed in Appendix B were diagnosed in a blood relative                                                                                                                                                                                                                                                                           |
| 3OA. Acute onset (days to 2 weeks) of symptoms                                                                                                                                                            | Onset and progression, from days to 2 weeks, of the first symptoms of the syndrome to the full disease presentation                                                                                                                                                                                                                                                                                 |
| 3OB. Subacute onset (> 2 weeks to ≤ 2 months) of symptoms                                                                                                                                                 | Onset and progression, from 2 weeks to 2 months, of the first symptoms of the syndrome to the full disease presentation                                                                                                                                                                                                                                                                             |
| 3OC. Insidious onset of symptoms > 2 months to years                                                                                                                                                      | Onset and progression of the syndrome to the full disease presentation over a time period of more than 2 months                                                                                                                                                                                                                                                                                     |
| 4O. History of episodic weakness associated with exercise or fasting                                                                                                                                      | Patient report of weakness after exercise or fasting, which is intermittent, rather than continuous                                                                                                                                                                                                                                                                                                 |
| 5O. <i>Arthritis</i>                                                                                                                                                                                      | Inflammation, including swelling, warmth, tenderness, and/or redness of one or more joints detected by physical exam                                                                                                                                                                                                                                                                                |
| 6O. <i>Polyarthralgia</i>                                                                                                                                                                                 | Pain in two or more joints reported by the patient                                                                                                                                                                                                                                                                                                                                                  |
| 7O. Joint contractures                                                                                                                                                                                    | Fixed limitation in the normal range of motion of joints in the absence of synovitis excluding reducible deformities, avascular necrosis and deforming arthropathy.                                                                                                                                                                                                                                 |
| 8O. <i>Unexplained fevers</i>                                                                                                                                                                             | Two or more episodes of documented body temperature of ≥ 38 degrees Celsius without obvious cause                                                                                                                                                                                                                                                                                                   |
| 9O. Interstitial lung disease                                                                                                                                                                             | Radiologic (chest x-ray or chest CT scan) documentation of inflammation or scarring (fibrosis) of the parenchyma of the lung                                                                                                                                                                                                                                                                        |
| 10O. Dysphagia or esophageal dysmotility                                                                                                                                                                  | Difficulty in swallowing or objective evidence of abnormal motility of the esophagus                                                                                                                                                                                                                                                                                                                |
| 11O. Objective improvement in strength or other disease manifestation after an adequate trial of glucocorticoid therapy and/or other immunosuppressive or immune modulating therapy for at least 8 weeks. | Documented increased strength after an adequate glucocorticoid treatment trial (definition: corticosteroids: – prednisone ≥0.75-2 mg/kg/day (or equivalent)) or after an adequate treatment trial with another form of immunosuppressive therapy for 8 weeks (for methotrexate, ≥10 mg/week (children: ≥0.3 mg/kg/week); for azathioprine 75 mg/d (or 2 mg/kg/day) or other (Check all that apply.) |

| <b>Muscle Biopsy Variables – from any biopsy</b>                                                 | <b>Definition</b>                                                                                                                                                  |
|--------------------------------------------------------------------------------------------------|--------------------------------------------------------------------------------------------------------------------------------------------------------------------|
| <i>1B. Necrosis of type I and type II muscle fibers, phagocytosis, degeneration of myofibers</i> | Necrotic or degenerating fibers appear pale and loose the cross-striations associated with the contractile apparatus. Vacuolation, or myofibrillar rarefaction may |

|                                                                                                                                   |                                                                                                                                                                                                                                                                                                                                                                        |
|-----------------------------------------------------------------------------------------------------------------------------------|------------------------------------------------------------------------------------------------------------------------------------------------------------------------------------------------------------------------------------------------------------------------------------------------------------------------------------------------------------------------|
|                                                                                                                                   | be seen. They may be invaded by macrophages (Phagocytosis) and vary in diameter with accompanying mononuclear infiltrates                                                                                                                                                                                                                                              |
| 2B. Regeneration of myofibers                                                                                                     | Fibers with focal basophilia with large nuclei                                                                                                                                                                                                                                                                                                                         |
| 3B. Endomysial, infiltration of mononuclear cells (MNCs) surrounding but not invading, myofibers                                  | Muscle biopsy reveals endomysial mononuclear cells abutting the sarcolemma of otherwise healthy, non-necrotic muscle fibers, but there is no clear invasion of the muscle fibers                                                                                                                                                                                       |
| 4B. Non-necrotic fibers surrounded and invaded by MNCs                                                                            | Muscle biopsy reveals mononuclear cells surrounding and invading otherwise healthy, non-necrotic muscle fibers.                                                                                                                                                                                                                                                        |
| 5B. Perimysial and/or perivascular infiltration of (MNCs)                                                                         | Mononuclear cells are located in the perimysium and/or located around blood vessels (in either perimysial or endomysial vessels).                                                                                                                                                                                                                                      |
| 6B. Perifascicular atrophy                                                                                                        | Muscle biopsy reveals several rows of muscle fibers which are smaller in the perifascicular region than fibers more centrally located.                                                                                                                                                                                                                                 |
| 7B. Vacuolated muscle fibers                                                                                                      | Muscle biopsy reveals multiple muscle fibers containing vacuoles                                                                                                                                                                                                                                                                                                       |
| 8B. Rimmed vacuoles                                                                                                               | Rimmed vacuoles are bluish by Hematoxylin and Eosin staining and reddish by modified Gomori- Trichrome stains.                                                                                                                                                                                                                                                         |
| 9B. Ragged red fibers, or cytochrome C oxidase negative fibers                                                                    | Ragged red fibers: On modified Gomori-Trichrome, staining fibers may appear to contain cracks and increased red stain in the subsarcolemmal regions. These fibers may stain intensely blue with nicotinic acid adenine dinucleotide dehydrogenase (NADH) or succinate dehydrogenase (SDH) stain or have absent or diminished staining with cytochrome C oxidase stain. |
| 10B. Many necrotic muscle fibers as the predominant feature. Inflammatory cells are sparse; perimysial infiltrate is not evident. | The major feature of the biopsy is necrotic muscle fibers. There may be phagocytosis of necrotic fibers but otherwise there is minimal inflammatory cell infiltrate evident except in the vicinity of necrotic muscle fibres and no perimysial infiltrate by routine histochemistry (Hematoxylin and Eosin or Trichrome stains)                                        |
| 11B Immunohistochemistry stainings available yes/no                                                                               | Yes:            No:                                                                                                                                                                                                                                                                                                                                                    |
| 12B. MHC Class I antigen present on scattered or more muscle fibers                                                               | Immunostaining reveals expression of MHC class I on the sarcolemma of scattered or more generally on muscle fibers.                                                                                                                                                                                                                                                    |
| 13B. Endomysial CD8+ cells surrounding myofibers with MHC Class I expression on myofibers                                         | Immunohistochemistry of the muscle biopsy reveals CD8 + T cells surrounding otherwise healthy, non-necrotic muscle fibers that express MHC class I antigen on their sarcolemma.                                                                                                                                                                                        |
| 14B. Membrane attach complex (MAC) depositions on small blood vessels, , or                                                       | Immunocytochemistry demonstrates deposition of membrane attack complex (MAC, C5b-9) on or around small blood vessels.                                                                                                                                                                                                                                                  |
| 15B. Reduced capillary density                                                                                                    | Reduced capillary density as appreciated on quantitative analysis                                                                                                                                                                                                                                                                                                      |
| 16B MHC-1 expression of perifascicular fibers                                                                                     | MHC-class I expression is predominant on perifascicular muscle fibers                                                                                                                                                                                                                                                                                                  |
| 17B. Electron microscopy information                                                                                              | Yes:            No:                                                                                                                                                                                                                                                                                                                                                    |



|                                                                                   |                                                                                            |
|-----------------------------------------------------------------------------------|--------------------------------------------------------------------------------------------|
| available y/n                                                                     |                                                                                            |
| 18B. Tubuloreticular inclusions in endothelial cells on electron microscopy       | <i>Tubuloreticular inclusions are evident in endothelial cells on electron microscopy</i>  |
| 19B. Intracellular amyloid deposits                                               | Intracellular amyloid deposits are evident in electron microscopy                          |
| 20B. 15-18 nm tubulofilaments by electron microscopy (EM)                         |                                                                                            |
| <b>Laboratory Variables – record the highest values during the disease course</b> | <b>Definition</b>                                                                          |
| 1L. Serum Creatine kinase (CK) activity                                           | Please list the highest absolute value available and the upper limits of normal with units |
| 2L. Serum Lactate dehydrogenase (LDH) activity                                    | Please list absolute values and upper limits of normal with units                          |
| 3L. Serum aspartate aminotransferase (ASAT/AST/SGOT) activity                     | Please list absolute values and upper limits of normal with units                          |
| 4L. Serum alanine aminotransferase (ALAT/ALT/SGPT) activity                       | Please list absolute values and upper limits of normal with units                          |
| 5L. Serum Aldolase activity                                                       | Please list absolute values and upper limits of normal with units                          |
| 6L. Erythrocyte sedimentation rate (ESR)                                          | Please list absolute values and upper limits of normal with units                          |
| 7L. C-reactive protein (CRP)                                                      | Please list absolute values and upper limits of normal with units                          |
| 8L. Autoantibody tests available y/n                                              | <b>Yes:</b> <input type="checkbox"/> <b>No:</b> <input type="checkbox"/>                   |
| 9L. Autoantibodies                                                                | Positive Negative Not tested                                                               |
| ANA                                                                               | <input type="checkbox"/> <input type="checkbox"/> <input type="checkbox"/>                 |
| Anti-Jo-1 (anti-His)                                                              | <input type="checkbox"/> <input type="checkbox"/> <input type="checkbox"/>                 |
| Anti-Mi-2                                                                         | <input type="checkbox"/> <input type="checkbox"/> <input type="checkbox"/>                 |
| Anti-SRP                                                                          | <input type="checkbox"/> <input type="checkbox"/> <input type="checkbox"/>                 |
| Anti-Ku                                                                           | <input type="checkbox"/> <input type="checkbox"/> <input type="checkbox"/>                 |
| Anti-PL7                                                                          | <input type="checkbox"/> <input type="checkbox"/> <input type="checkbox"/>                 |
| Anti-PL-12                                                                        | <input type="checkbox"/> <input type="checkbox"/> <input type="checkbox"/>                 |
| Anti-PM-Scl                                                                       | <input type="checkbox"/> <input type="checkbox"/> <input type="checkbox"/>                 |
| Anti-SSA                                                                          | <input type="checkbox"/> <input type="checkbox"/> <input type="checkbox"/>                 |
| Anti-Ro52/SSA                                                                     | <input type="checkbox"/> <input type="checkbox"/> <input type="checkbox"/>                 |
| Anti-Ro60/SSA                                                                     | <input type="checkbox"/> <input type="checkbox"/> <input type="checkbox"/>                 |
| Anti-La/SSB                                                                       | <input type="checkbox"/> <input type="checkbox"/> <input type="checkbox"/>                 |
| Anti-ribonucleoprotein (RNP)-70K (U1snRNP)                                        | <input type="checkbox"/> <input type="checkbox"/> <input type="checkbox"/>                 |
| Anti-RNP-A                                                                        | <input type="checkbox"/> <input type="checkbox"/> <input type="checkbox"/>                 |
| Anti-RNP-C                                                                        | <input type="checkbox"/> <input type="checkbox"/> <input type="checkbox"/>                 |
| Anti-Centromere B (ACA)                                                           | <input type="checkbox"/> <input type="checkbox"/> <input type="checkbox"/>                 |
| Anti-Topoisomerase-1/Scl70,                                                       | <input type="checkbox"/> <input type="checkbox"/> <input type="checkbox"/>                 |
| Anti-Ribosomal P antigen                                                          | <input type="checkbox"/> <input type="checkbox"/> <input type="checkbox"/>                 |
| Anti-Sm                                                                           | <input type="checkbox"/> <input type="checkbox"/> <input type="checkbox"/>                 |
| Anti-SmB                                                                          | <input type="checkbox"/> <input type="checkbox"/> <input type="checkbox"/>                 |
| Anti-SmD                                                                          | <input type="checkbox"/> <input type="checkbox"/> <input type="checkbox"/>                 |
| RF                                                                                | <input type="checkbox"/> <input type="checkbox"/> <input type="checkbox"/>                 |
| Anti-CCP                                                                          | <input type="checkbox"/> <input type="checkbox"/> <input type="checkbox"/>                 |
| Other, please specify below                                                       | <input type="checkbox"/> <input type="checkbox"/> <input type="checkbox"/>                 |

| <b>EMG performed y/n</b>                                                                                                                                                       | <b>Yes:</b>                                                                                                                                                                                                                                                                                                                                                                                                                   | <b>No:</b> |
|--------------------------------------------------------------------------------------------------------------------------------------------------------------------------------|-------------------------------------------------------------------------------------------------------------------------------------------------------------------------------------------------------------------------------------------------------------------------------------------------------------------------------------------------------------------------------------------------------------------------------|------------|
| <i>1. Electromyogram (EMG) - Increased insertional and spontaneous activity in the form of fibrillation potentials, positive sharp waves, or complex repetitive discharges</i> | Increased insertional activity: upon insertion of the EMG needle there are fibrillation potentials, positive sharp waves, or complex repetitive discharges or myotonic discharges.<br>Increased spontaneous activity: fibrillation potentials, positive sharp waves, complex repetitive discharges or pseudomyotonic discharges are seen on needle EMG even when the needle is resting in the muscle without further movement |            |
| <i>2. EMG - Morphometric analysis reveals the presence of short duration, small amplitude, polyphasic motor unit action potentials (MUAPs)</i>                                 | Analysis of at least 20 individual motor unit action potentials reveals that the average duration is short, amplitude is small, and phases are greater than 4.                                                                                                                                                                                                                                                                |            |
| <b>MRI performed y/n</b>                                                                                                                                                       | <b>Yes:</b>                                                                                                                                                                                                                                                                                                                                                                                                                   | <b>No:</b> |
| 1. Muscle oedema on STIR or T2-weighted magnetic resonance imaging (MRI)                                                                                                       | Increased signal in muscle, often symmetric, by short tau inversion recovery (STIR)- or T-2 weighted MRI imaging, without other known cause                                                                                                                                                                                                                                                                                   |            |
| 2. Muscle atrophy or replacement of muscle by fat on T1-weighted MRI scanning consistent with myositis                                                                         | Decreased muscle volume (i.e., muscle atrophy) or increased fat content of muscle by T1-weighted MRI imaging, without other known cause                                                                                                                                                                                                                                                                                       |            |
| 13L. Skin biopsy compatible with dermatomyositis (or lupus)                                                                                                                    | Biopsy findings consistent with dermatomyositis or lupus (these could include: intradermal or perivascular inflammatory cell infiltrate, liquefaction, basal cell degeneration, epidermal atrophy, hyperkeratosis, melanin incontinence, mucin deposition)                                                                                                                                                                    |            |
| <b><u>Other features important in making the diagnosis not listed above</u></b>                                                                                                | Any other documented clinical signs, symptoms or laboratory findings, not listed above, that were important in diagnosing the patient                                                                                                                                                                                                                                                                                         |            |

**Supplementary 5.** Adult comparator cases in the International Myositis Classification Criteria Project dataset

| <b>DIAGNOSIS*</b>                                                       | <b>n (%)</b>      |
|-------------------------------------------------------------------------|-------------------|
| <b>Systemic inflammatory disease</b>                                    | <b>181 (35.7)</b> |
| Systemic sclerosis                                                      | 49                |
| Systemic lupus erythematosus                                            | 41                |
| Polymyalgia reumatica                                                   | 20                |
| Mixed connective tissue disease                                         | 15                |
| Systemic vasculitis                                                     | 15                |
| Sjögren's syndrome                                                      | 10                |
| Rheumatoid arthritis                                                    | 9                 |
| Undifferentiated connective tissue disease                              | 6                 |
| Granulomatous myositis (sarcoidosis)                                    | 2                 |
| Polyarthritis                                                           | 2                 |
| Raynaud's syndrome                                                      | 2                 |
| Crohn's disease                                                         | 1                 |
| Remitting Seronegative Symmetrical Synovitis with Pitting Edema (RS3PE) | 1                 |
| Granulomatous myositis                                                  | 1                 |
| Ankylosis spondylitis                                                   | 1                 |
| Undifferentiated spondyloarthropathy                                    | 1                 |
| Undifferentiated myopathy                                               | 1                 |
| Osteoarthritis                                                          | 1                 |
| Soft tissue rheumatism                                                  | 1                 |
| Panniculitis                                                            | 1                 |
| Not specified                                                           | 1                 |
|                                                                         |                   |
| <b>Dystrophy</b>                                                        | <b>68 (13.4)</b>  |
| Limb-girdle dystrophy                                                   | 27                |
| Fascioscapulohumeral dystrophy                                          | 11                |
| Myotonic dystrophy                                                      | 8                 |
| Dysferlinopathy                                                         | 5                 |
| Becker's dystrophy                                                      | 5                 |
| Occulopharngéal muscular dystrophy                                      | 3                 |
| Welanders distal myopathy                                               | 2                 |
| Proximal myotonic myopathy (myotonic dystrophy type 2)                  | 1                 |
| Nemaline myopathy                                                       | 1                 |
| Emery-Dreifuss muscular dystrophy                                       | 1                 |
| Progressive muscular dystrophy                                          | 1                 |
| Generalized muscle pseudo-hypertrophy (Myotilinopathy)                  | 1                 |
| Not specified                                                           | 2                 |
|                                                                         |                   |
| <b>Drug or toxin-associated myopathy</b>                                | <b>48 (9.5)</b>   |
| Statin induced myopathy                                                 | 20                |
| Glucocorticoid induced myopathy                                         | 5                 |
| D-penicillamine                                                         | 2                 |
| Acute rhabdomyolysis                                                    | 5                 |
| Dropped head, related to psychiatric medication                         | 1                 |
| Alcohol induced Neuromyopathy                                           | 1                 |
| Drug-induced rhabdomyolysis                                             | 3                 |
| Unknown cause                                                           | 1                 |
| Related to anti HIV therapy                                             | 1                 |

|                                                                           |                 |
|---------------------------------------------------------------------------|-----------------|
| Rhabdomyolysis from over exertion and dehydration                         | 1               |
| Hydrochloroquine                                                          | 1               |
| Ranitidine induced myopathy                                               | 1               |
| Not specified                                                             | 6               |
| <b>Motor neuron disease / neuropathies</b>                                | <b>44 (8.7)</b> |
| Amyotrophic lateral sclerosis (ALS)                                       | 24              |
| Gullain-Barre syndrome                                                    | 3               |
| Myasthenia gravis                                                         | 2               |
| Kennedy's disease                                                         | 2               |
| Multiple mononeuropathy due to systemic lupus erythematosus               | 1               |
| Spinal muscle atrophy                                                     | 1               |
| Peripheral neuropathy                                                     | 1               |
| Progressive muscular atrophy                                              | 1               |
| Multiple myeloma and chronic demyelinating inflammatory neuropathy        | 1               |
| Not specified                                                             | 8               |
| <b>Metabolic myopathy</b>                                                 | <b>29 (5.7)</b> |
| Mc Ardle's disease                                                        | 6               |
| Asymptomatic hyper-CK-emia                                                | 6               |
| Acid maltase deficiency                                                   | 4               |
| Phosphofructokinase deficiency                                            | 2               |
| Familial hyper-CK-emia                                                    | 1               |
| Carnitine deficiency                                                      | 1               |
| Palmityltransferase deficiency                                            | 1               |
| Myoadenylate deaminase deficiency                                         | 1               |
| Hypokalemia                                                               | 1               |
| Hypocalcemia                                                              | 1               |
| Sandhoff disease                                                          | 1               |
| Late onset Pompe                                                          | 1               |
| Phosphorilase B kinase deficiency                                         | 1               |
| Metabolic Myopathy Unspecified                                            | 1               |
| Not specified                                                             | 1               |
| <b>Myalgias</b>                                                           | <b>27 (5.3)</b> |
| Fibromyalgia                                                              | 25              |
| Myalgia                                                                   | 2               |
| <b>Dermatologic disease</b>                                               | <b>21 (4.1)</b> |
| Hypereosinophilic syndrome                                                | 5               |
| Psoriasis                                                                 | 4               |
| Psoriatic arthritis                                                       | 3               |
| Subacute cutaneous lupus erythematosus                                    | 3               |
| Discoid lupus erythematosus                                               | 3               |
| SLE complicated by tumid lupus and subacute cutaneous lupus erythematosus | 1               |
| Psoriatic sponyloarthropathy                                              | 1               |
| Rosacea                                                                   | 1               |
| <b>Endocrine myopathy</b>                                                 | <b>22 (4.3)</b> |
| Hypothyroidism                                                            | 18              |

|                                                                    |                 |
|--------------------------------------------------------------------|-----------------|
| Hyperthyroidism                                                    | 1               |
| Cushing syndrome                                                   | 1               |
| Diabetes mellitus                                                  | 1               |
| Hashimoto disease, sarcoidosis and gastric chronica atrophica      | 1               |
|                                                                    |                 |
|                                                                    |                 |
| <b>Infectious myopathy</b>                                         | <b>20 (3.7)</b> |
| Viral myopathy                                                     | 12              |
| Parasitic myopathy                                                 | 1               |
| Tuberculous myositis & fasciitis                                   | 1               |
| Tuberculosis                                                       | 1               |
| Tuberculosis rheumatism                                            | 1               |
| Pneumonia                                                          | 2               |
| Whipple´s disease                                                  | 1               |
| Not specified                                                      | 1               |
|                                                                    |                 |
| <b>Mitochondrial myopathy</b>                                      | <b>15 (3.0)</b> |
| Myoclonic epilepsy, ragged red fibers (MERRF)                      | 1               |
| Encephalopathy + myopathy but normal lactate curve                 | 1               |
| CPEO                                                               | 1               |
| Mitochondrial cytopathy                                            | 1               |
| Abnormal mt DNA                                                    | 1               |
| Not specified                                                      | 10              |
|                                                                    |                 |
|                                                                    |                 |
| <b>Neuromuscular disease</b>                                       | <b>12 (2.4)</b> |
| Myopathy non inflammatory                                          | 2               |
| Lambert Eatons Myastenic Syndrome (LEMS)                           | 1               |
| Hereditary inclusion body myopathy                                 | 1               |
| HCV-related axonal polyneuropathy                                  | 1               |
| Lumbar radiculopathy                                               | 1               |
| Polyradiculopathy                                                  | 1               |
| Charcot-Marie-Tooth disease peroneal muscular atrophy              | 1               |
| Chronic axonal polyneuropathy                                      | 1               |
| Lumboischialgia                                                    | 1               |
| Central pontine myelinolysis                                       | 1               |
| Not specified                                                      | 1               |
|                                                                    |                 |
|                                                                    |                 |
| <b>Other myopathy</b>                                              | <b>12 (2.4)</b> |
| Paraneoplastic syndrome                                            | 2               |
| Non-autoimmune myositis                                            | 2               |
| Crural biceps myopathy, not specified                              | 1               |
| Myopathy secondary to neuroleptic malignant syndrome               | 1               |
| Macro CK type 1                                                    | 1               |
| Oculopharyngeal myopathy                                           | 1               |
| Necrotising myopathy                                               | 1               |
| Paraneoplastic myopathy (neoplastic hypophosphatemia osteomalacia) | 1               |
| Distal myopathy non diagnostic                                     | 1               |
| Undifferentiated myopathy                                          | 1               |
|                                                                    |                 |
|                                                                    |                 |
| <b>Immune-mediated skin condition</b>                              | <b>3 (0.6)</b>  |

|                        |                                                                             |                |
|------------------------|-----------------------------------------------------------------------------|----------------|
|                        | Allergies                                                                   | 2              |
|                        | Hypersensitivity conditions                                                 | 1              |
|                        |                                                                             |                |
| <b>Other diagnosis</b> |                                                                             | <b>5 (1.2)</b> |
|                        | Mixed crystal-induced myoarthropathies                                      | 1              |
|                        | Chronic, non-inflammatory back pain                                         | 1              |
|                        | Amyloidosis                                                                 | 1              |
|                        | Still diagnosed for apocamnosis, suspicion of congenital myotonic dystrophy | 1              |
|                        | Multicentric reticulohistiocytosis                                          | 1              |
|                        |                                                                             |                |
| <b>TOTAL</b>           |                                                                             | <b>507</b>     |

\* As entered by treating physician

Abbreviations: CK=Creatine kinase, CPEO= Chronic progressive external ophthalmoplegia

**Supplementary 6.** Juvenile comparator cases in the International Myositis Classification Criteria Project dataset

| <b>DIAGNOSIS*</b>                                            | <b>n (%)</b>     |
|--------------------------------------------------------------|------------------|
| <b>Systemic inflammatory disease</b>                         | <b>47 (40.2)</b> |
| Systemic lupus erythematosus                                 | 16               |
| Mixed connective tissue disease                              | 15               |
| Juvenile idiopathic arthritis                                | 9                |
| Undifferentiated connective tissue disease                   | 3                |
| Systemic sclerosis                                           | 2                |
| Celiac disease                                               | 1                |
| Crohn's disease                                              | 1                |
|                                                              |                  |
| <b>Dystrophy</b>                                             | <b>32 (27.4)</b> |
| Limb-girdle dystrophy                                        | 8                |
| Duchenne's dystrophy                                         | 6                |
| Becker's dystrophy                                           | 6                |
| Fascioscapulohumeral dystrophy                               | 3                |
| Becker Muscular Dystrophy                                    | 2                |
| Dysferlinopathy                                              | 1                |
| Congenital muscular dystrophy positive merosin               | 1                |
| Probably a mild limb girdle, FKRP mutation, L276I homozygote | 1                |
| Calpain deficient myopathy (limb-girdle)                     | 1                |
| Carrier Duchenne Muscular Dystrophy                          | 1                |
| Fascioscapular Humoral Dystrophy                             | 1                |
| Not specified                                                | 1                |
|                                                              |                  |
| <b>Metabolic myopathy</b>                                    | <b>14 (12.0)</b> |
| Pompe's disease                                              | 11               |
| Acid maltase deficiency                                      | 1                |
| Carnitine deficiency                                         | 1                |
| Metabolic myopathy, unspecified                              | 1                |
|                                                              |                  |
| <b>Infectious myopathy</b>                                   | <b>8 (6.8)</b>   |
| Viral myopathy                                               | 4                |
| Parasitic myopathy                                           | 1                |
| Post - mycoplasma myositis                                   | 1                |
| Focal myositis                                               | 1                |
| Staphylococcus pyomyositis                                   | 1                |
|                                                              |                  |
| <b>Motor neuron disease</b>                                  | <b>4 (3.4)</b>   |
| Myasthenia gravis                                            | 3                |
| Spinal Muscular Atrophy, type III                            | 1                |
|                                                              |                  |
| <b>Neuromuscular disease</b>                                 | <b>4 (3.4)</b>   |
| Congenital myopathy, unknown origin                          | 1                |
| Griscillis' syndrome with critical illness myopathy          | 1                |
| Muscular dystrophy. R/o distal myopathy                      | 1                |
| Charcot-Marie-Tooth                                          | 1                |
|                                                              |                  |
| <b>Dermatologic disease</b>                                  | <b>2 (1.7)</b>   |
| Hyper eosinophilic syndrome                                  | 2                |

|                                          |                |
|------------------------------------------|----------------|
|                                          |                |
| <b>Drug or toxin-associated myopathy</b> | <b>1 (0.9)</b> |
| Rhabdomyolysis                           | 1              |
|                                          |                |
| <b>Endocrine myopathy</b>                | <b>1 (0.9)</b> |
| Hypothyroidism                           | 1              |
|                                          |                |
| <b>Myalgias</b>                          | <b>1 (0.9)</b> |
| Fibromyalgia                             | 1              |
|                                          |                |
| <b>Other diagnosis</b>                   | <b>3 (2.6)</b> |
| Myositis ossificans                      | 1              |
| Teratoma                                 | 1              |
| Other diagnosis, unspecified             | 1              |
|                                          |                |
| <b>TOTAL</b>                             | <b>117</b>     |

\* As entered by treating physician

Abbreviations: NYD=x



**Supplementary 7. Validation cohort from the Euromyositis register**

|                                              | <b>Patients*</b><br>(n=592) |
|----------------------------------------------|-----------------------------|
| <b>Sex, n (%)</b>                            |                             |
| Female                                       | 412 (69.6)                  |
| Male                                         | 174 (29.4)                  |
| NA                                           | 6 (1.0)                     |
| <b>Diagnosis†, n (%)</b>                     |                             |
| Polymyositis                                 | 256 (46.7)                  |
| Dermatomyositis                              | 242 (45.3)                  |
| Inclusion body myositis                      | 30 (5.5)                    |
| Juvenile dermatomyositis                     | 16 (2.9)                    |
| Amyopathic dermatomyositis                   | 4 (0.7)                     |
| <b>Disease duration, median (IQR), years</b> | 6.0 (3.0-12.0)              |
| <b>Ethnicity‡, n (%)</b>                     |                             |
| Caucasian                                    | 485 (81.9)                  |
| Hispanic                                     | 6 (1.0)                     |
| Oriental                                     | 3 (0.5)                     |
| Afro-Caribbean                               | 1 (0.2)                     |
| Asian                                        | 3 (0.5)                     |
| NA                                           | 94 (15.9)                   |

\*Data from Karolinska University Hospital, Stockholm, Sweden, Prague Hospital, Prague, Czech Republic and Oslo University Hospital, Oslo, Norway

†As defined in the Euromyositis register

Abbreviations: NA=Information not available, IQR=Interquartile range

**Supplementary 8.** Validation cohort from the Juvenile dermatomyositis cohort biomarker study and repository (UK and Ireland)

|                                               | <b>Patients</b><br>(n=332) |
|-----------------------------------------------|----------------------------|
| <b>Sex</b> , n (%)                            |                            |
| Female                                        | 227 (68.4)                 |
| Male                                          | 104 (31.3)                 |
| NA                                            | 1 (0.3)                    |
| <b>Diagnosis</b> <sup>*</sup> , n (%)         |                            |
| Definite juvenile dermatomyositis             | 292 (88.0)                 |
| Probable juvenile dermatomyositis             | 20 (6.0)                   |
| Focal myositis                                | 6 (1.8)                    |
| Definite polymyositis                         | 4 (1.2)                    |
| Probable polymyositis                         | 2 (6.0)                    |
| Other IIM                                     | 8 (2.4)                    |
| <b>Disease duration</b> , median (IQR), years | 7.7 (3.9-11.7)             |
| <b>Ethnicity</b> <sup>*</sup> , n (%)         |                            |
| White                                         | 261 (78.6)                 |
| Black-African                                 | 10 (3.0)                   |
| Black-Caribbean                               | 11 (3.3)                   |
| Black-Other                                   | 4 (1.2)                    |
| Pakistani                                     | 11 (3.3)                   |
| Indian                                        | 10 (3.0)                   |
| Bangladeshi                                   | 4 (1.2)                    |
| Chinese                                       | 1 (0.30)                   |
| Other ethnic group                            | 19 (5.7)                   |
| NA                                            | 1 (0.30)                   |

<sup>\*</sup>As defined in the Juvenile dermatomyositis cohort biomarker study and repository (UK and Ireland)  
NA, information not available; IIM, idiopathic inflammatory myopathies; IQR, interquartile range.
